# Supplementary material for: Exogenous miR-29B Delivery Through a Hyaluronan-Based Injectable System Yields Functional Maintenance of the Infarcted Myocardium
Source: PubMed Central journal article supplement — Tissue Eng Part A. 2018 Jan 1;24(1-2):57–67. doi: 10.1089/ten.tea.2016.0527 (PMC5770094; doi:10.1089/ten.tea.2016.0527), 2018-01-01
Supplement: Supp_Fig1.pdf [file Supp_Fig1.pdf]

## Supplementary Data

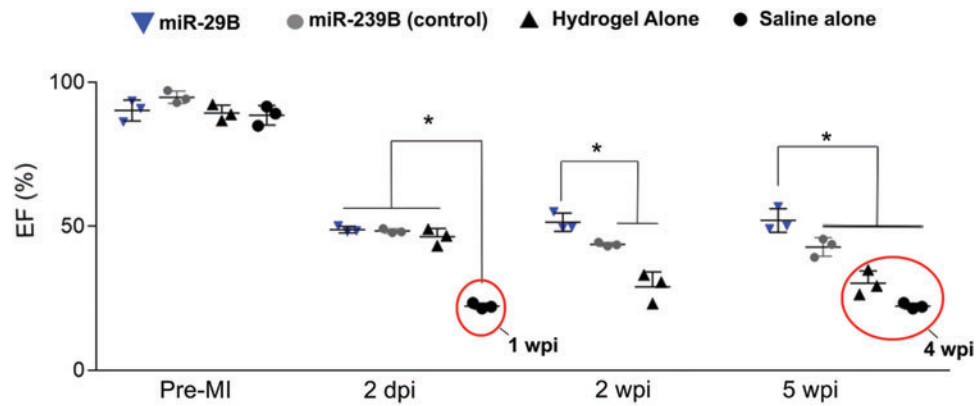

**SUPPLEMENTARY FIG. S1.** Morphometric data at 2 dpi and 2 and 5 wpi with treatment of miR-239B (control), miR-29B delivered using a hyaluronan-based hydrogel, the hyaluronan-based hydrogel alone (in the case of the hyaluronan-based hydrogel alone, measurements were performed at 2 days and 2 and 4 wpi), and saline only injection (measurements were performed at 1 and 4 wpi). Asterisk (\*) indicates a statistically significant difference in EF between the groups indicated, at the time points indicated ( $p < 0.05$ ). dpi, days postinfarction; EF, ejection fraction; miR-29B, microRNA-29B; wpi, weeks postinfarction.
