# Supplementary material for: Exogenous miR-29B Delivery Through a Hyaluronan-Based Injectable System Yields Functional Maintenance of the Infarcted Myocardium
Source: PubMed Central journal article supplement — Tissue Eng Part A. 2018 Jan 1;24(1-2):57–67. doi: 10.1089/ten.tea.2016.0527 (PMC5770094; doi:10.1089/ten.tea.2016.0527), 2018-01-01
Supplement: Supp_Fig2.pdf [file Supp_Fig2.pdf]

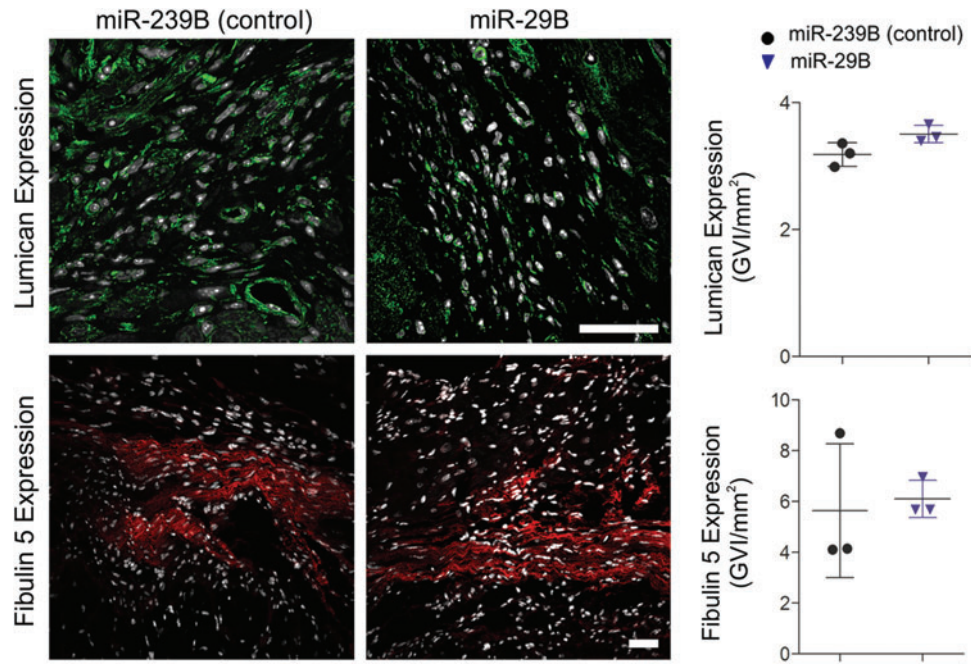

**SUPPLEMENTARY FIG. S2.** Immunostaining and quantification of lumican and fibulin 5 expression of infarcts treated with miR-239B and miR-29B. No significant difference in GVI of lumican or fibulin 5 was detected between the treatment of miR-239B (control) and miR-29B. Scale bar: 50  $\mu$ m. GVI, gray value intensities.
