# Supplementary material for: Exogenous miR-29B Delivery Through a Hyaluronan-Based Injectable System Yields Functional Maintenance of the Infarcted Myocardium
Source: PubMed Central journal article supplement — Tissue Eng Part A. 2018 Jan 1;24(1-2):57–67. doi: 10.1089/ten.tea.2016.0527 (PMC5770094; doi:10.1089/ten.tea.2016.0527), 2018-01-01
Supplement: Supp_Fig3.pdf [file Supp_Fig3.pdf]

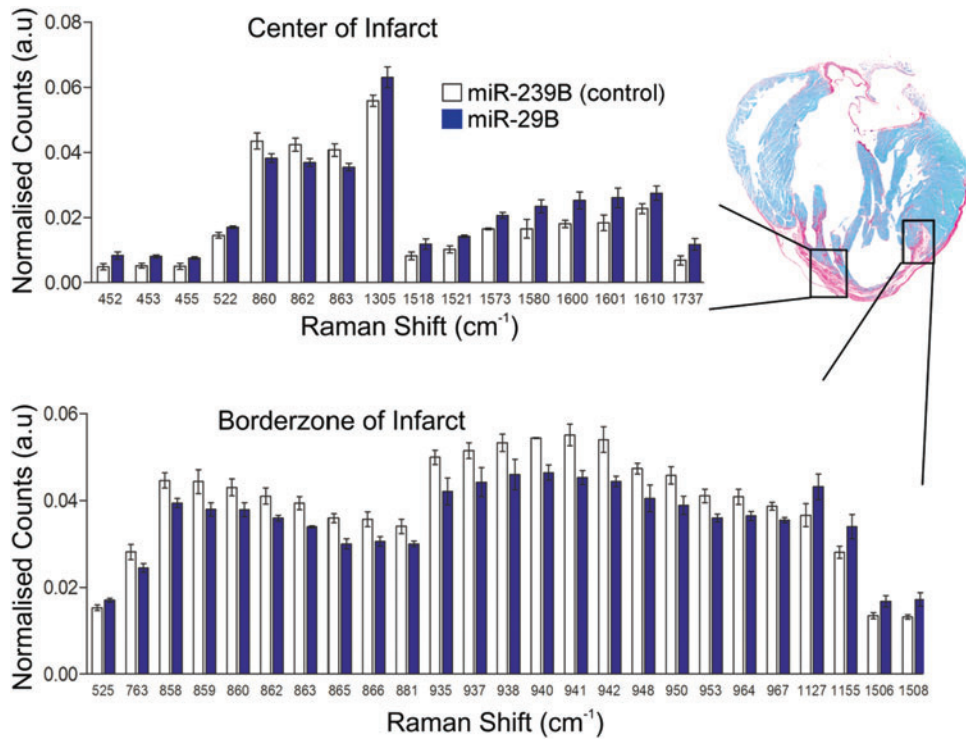

**SUPPLEMENTARY FIG. S3.** Normalized counts of Raman signals after normalization at specific peaks, which show statistically significant alterations ( $p < 0.05$  at all the peaks shown) when comparing treatment of miR-29B with miR-239B (control) in the center of the infarct and border zone of the infarct. The biochemical fingerprints assigned to the significantly altered Raman shifts are listed in Table 2.
